# Supplementary material for: An open-source, citizen science and machine learning approach to analyse subsea movies
Source: Biodivers Data J. 2021 Feb 24;9:e60548. doi: 10.3897/BDJ.9.e60548 (PMC7930014; doi:10.3897/BDJ.9.e60548)
Supplement: Supplementary material 2 — Metadata for movies used in the case study [file bdj-09-e60548-s002.xlsx]

## Sheet: Sampling Events
eventID	FileNameOriginal	FilenameInThisStudy	references	datasetName	basisOfRecord	bibliographicCitation	rightsHolder	type	associatedMedia	fieldNumber	license	eventDate	samplingProtocol	samplingEffort	locationID	SiteDecription	locality	habitat	kingdom	scientificName	taxonRank	occurrenceStatus	decimalLatitude	decimalLongitude	geodeticDatum	countryCode	waterBody
	000114 TMBL-ROV 2000 Säckenrevet Tape 55	M000114	https://preprints.arphahub.com/article/60597/	Marine images and movies from Remotely Operated Vehicle (ROV)	MachineObservation	Tomas Lundälv and Lisbeth Jonsson, University of Gothenburg	University of Gothenburg	MovingImage	movie available on request		CC BY 4.0	2000-01-14	Marine images and movies from Remotely Operated Vehicle (ROV)	"Total_time":"159"| Total_length_m":"unknown"	"Säcken reef"	Reef Säcken	Kosterhavet	9.2 Marine Neritic – Subtidal rock and rocky reefs	Animalia	Desmophyllum pertusum	Species	present	58.8794	11.1131	WGS84	SE	Skagerrak
	010424 Säckenrevet beta Tape 74	M010424	https://preprints.arphahub.com/article/60597/	Marine images and movies from Remotely Operated Vehicle (ROV)	MachineObservation	Tomas Lundälv and Lisbeth Jonsson, University of Gothenburg	University of Gothenburg	MovingImage	movie available on request		CC BY 4.0	2001-04-24	Marine images and movies from Remotely Operated Vehicle (ROV)	"Total_time":"109"| Total_length_m":"1805"	"Säcken reef"	Reef Säcken	Kosterhavet	9.2 Marine Neritic – Subtidal rock and rocky reefs	Animalia	Desmophyllum pertusum	Species	present	58.8794	11.1131	WGS84	SE	Skagerrak
	020130 TMBL-ROV 2002 Säcken transekt 1	M020130	https://preprints.arphahub.com/article/60597/	Marine images and movies from Remotely Operated Vehicle (ROV)	MachineObservation	Tomas Lundälv and Lisbeth Jonsson, University of Gothenburg	University of Gothenburg	MovingImage	movie available on request		CC BY 4.0	2002-01-30	Marine images and movies from Remotely Operated Vehicle (ROV)	"Total_time":"28"| Total_length_m":"40"	"Säcken reef"	Reef Säcken	Kosterhavet	9.2 Marine Neritic – Subtidal rock and rocky reefs	Animalia	Desmophyllum pertusum	Species	present	58.8794	11.1131	WGS84	SE	Skagerrak
	030317-18 TMBL-ROV 2003 Säckenrevet	M030317	https://preprints.arphahub.com/article/60597/	Marine images and movies from Remotely Operated Vehicle (ROV)	MachineObservation	Tomas Lundälv and Lisbeth Jonsson, University of Gothenburg	University of Gothenburg	MovingImage	movie available on request		CC BY 4.0	2003-03-17	Marine images and movies from Remotely Operated Vehicle (ROV)	"Total_time":"95"| Total_length_m":"1465"	"Säcken reef"	Reef Säcken	Kosterhavet	9.2 Marine Neritic – Subtidal rock and rocky reefs	Animalia	Desmophyllum pertusum	Species	present	58.8794	11.1131	WGS84	SE	Skagerrak
	040220 TMBL-ROV 2004 Säckenrevet alfa	M040220	https://preprints.arphahub.com/article/60597/	Marine images and movies from Remotely Operated Vehicle (ROV)	MachineObservation	Tomas Lundälv and Lisbeth Jonsson, University of Gothenburg	University of Gothenburg	MovingImage	movie available on request		CC BY 4.0	2004-02-20	Marine images and movies from Remotely Operated Vehicle (ROV)	"Total_time":"60"| Total_length_m":"81"	"Säcken reef"	Reef Säcken	Kosterhavet	9.2 Marine Neritic – Subtidal rock and rocky reefs	Animalia	Desmophyllum pertusum	Species	present	58.8794	11.1131	WGS84	SE	Skagerrak
	1455002	M01455002	https://preprints.arphahub.com/article/60597/	Marine images and movies from Remotely Operated Vehicle (ROV)	MachineObservation	Tomas Lundälv and Lisbeth Jonsson, University of Gothenburg	University of Gothenburg	MovingImage	movie available on request		CC BY 4.0	2012-10-24	Marine images and movies from Remotely Operated Vehicle (ROV)	"Total_time":"14"| Total_length_m":"unknown"	"Säcken reef"	Reef Säcken	Kosterhavet	9.2 Marine Neritic – Subtidal rock and rocky reefs	Animalia	Metazoa	kingdom	present	58.8794	11.1131	WGS84	SE	Skagerrak
	1455003	M01455003	https://preprints.arphahub.com/article/60597/	Marine images and movies from Remotely Operated Vehicle (ROV)	MachineObservation	Tomas Lundälv and Lisbeth Jonsson, University of Gothenburg	University of Gothenburg	MovingImage	movie available on request		CC BY 4.0	2012-10-24	Marine images and movies from Remotely Operated Vehicle (ROV)	"Total_time":"14"| Total_length_m":"unknown"	"Säcken reef"	Reef Säcken	Kosterhavet	9.2 Marine Neritic – Subtidal rock and rocky reefs	Animalia	Metazoa	kingdom	present	58.8794	11.1131	WGS84	SE	Skagerrak
	1485006	M01485006	https://preprints.arphahub.com/article/60597/	Marine images and movies from Remotely Operated Vehicle (ROV)	MachineObservation	Tomas Lundälv and Lisbeth Jonsson, University of Gothenburg	University of Gothenburg	MovingImage	movie available on request		CC BY 4.0	2013-01-08	Marine images and movies from Remotely Operated Vehicle (ROV)	"Total_time":"5"| Total_length_m":"unknown"	"Säcken reef"	Reef Säcken	Kosterhavet	9.2 Marine Neritic – Subtidal rock and rocky reefs	Animalia	Metazoa	kingdom	present	58.8794	11.1131	WGS84	SE	Skagerrak
	1487001	M01487001	https://preprints.arphahub.com/article/60597/	Marine images and movies from Remotely Operated Vehicle (ROV)	MachineObservation	Tomas Lundälv and Lisbeth Jonsson, University of Gothenburg	University of Gothenburg	MovingImage	movie available on request		CC BY 4.0	2013-01-08	Marine images and movies from Remotely Operated Vehicle (ROV)	"Total_time":"5"| Total_length_m":"unknown"	"Säcken reef"	Reef Säcken	Kosterhavet	9.2 Marine Neritic – Subtidal rock and rocky reefs	Animalia	Metazoa	kingdom	present	58.8794	11.1131	WGS84	SE	Skagerrak
	1487002	M01487002	https://preprints.arphahub.com/article/60597/	Marine images and movies from Remotely Operated Vehicle (ROV)	MachineObservation	Tomas Lundälv and Lisbeth Jonsson, University of Gothenburg	University of Gothenburg	MovingImage	movie available on request		CC BY 4.0	2013-01-08	Marine images and movies from Remotely Operated Vehicle (ROV)	"Total_time":"5"| Total_length_m":"unknown"	"Säcken reef"	Reef Säcken	Kosterhavet	9.2 Marine Neritic – Subtidal rock and rocky reefs	Animalia	Metazoa	kingdom	present	58.8794	11.1131	WGS84	SE	Skagerrak
	1487003	M01487003	https://preprints.arphahub.com/article/60597/	Marine images and movies from Remotely Operated Vehicle (ROV)	MachineObservation	Tomas Lundälv and Lisbeth Jonsson, University of Gothenburg	University of Gothenburg	MovingImage	movie available on request		CC BY 4.0	2013-01-08	Marine images and movies from Remotely Operated Vehicle (ROV)	"Total_time":"5"| Total_length_m":"unknown"	"Säcken reef"	Reef Säcken	Kosterhavet	9.2 Marine Neritic – Subtidal rock and rocky reefs	Animalia	Metazoa	kingdom	present	58.8794	11.1131	WGS84	SE	Skagerrak
	1487004	M01487004	https://preprints.arphahub.com/article/60597/	Marine images and movies from Remotely Operated Vehicle (ROV)	MachineObservation	Tomas Lundälv and Lisbeth Jonsson, University of Gothenburg	University of Gothenburg	MovingImage	movie available on request		CC BY 4.0	2013-01-08	Marine images and movies from Remotely Operated Vehicle (ROV)	"Total_time":"5"| Total_length_m":"unknown"	"Säcken reef"	Reef Säcken	Kosterhavet	9.2 Marine Neritic – Subtidal rock and rocky reefs	Animalia	Metazoa	kingdom	present	58.8794	11.1131	WGS84	SE	Skagerrak
	1487005	M01487005	https://preprints.arphahub.com/article/60597/	Marine images and movies from Remotely Operated Vehicle (ROV)	MachineObservation	Tomas Lundälv and Lisbeth Jonsson, University of Gothenburg	University of Gothenburg	MovingImage	movie available on request		CC BY 4.0	2013-01-08	Marine images and movies from Remotely Operated Vehicle (ROV)	"Total_time":"5"| Total_length_m":"unknown"	"Säcken reef"	Reef Säcken	Kosterhavet	9.2 Marine Neritic – Subtidal rock and rocky reefs	Animalia	Metazoa	kingdom	present	58.8794	11.1131	WGS84	SE	Skagerrak
	1642003	M01642003	https://preprints.arphahub.com/article/60597/	Marine images and movies from Remotely Operated Vehicle (ROV)	MachineObservation	Roger Johansson, University of Gothenburg	University of Gothenburg	MovingImage	movie available on request		CC BY 4.0	2014-09-04	Marine images and movies from Remotely Operated Vehicle (ROV)	"Total_time":"10"| Total_length_m":"unknown"	"Säcken reef"	Reef Säcken	Kosterhavet	9.2 Marine Neritic – Subtidal rock and rocky reefs	Animalia	Desmophyllum pertusum	Species	present	58.8794	11.1131	WGS84	SE	Skagerrak
	1642005	M01642005	https://preprints.arphahub.com/article/60597/	Marine images and movies from Remotely Operated Vehicle (ROV)	MachineObservation	Roger Johansson, University of Gothenburg	University of Gothenburg	MovingImage	movie available on request		CC BY 4.0	2014-09-04	Marine images and movies from Remotely Operated Vehicle (ROV)	"Total_time":"10"| Total_length_m":"unknown"	"Säcken reef"	Reef Säcken	Kosterhavet	9.2 Marine Neritic – Subtidal rock and rocky reefs	Animalia	Desmophyllum pertusum	Species	present	58.8794	11.1131	WGS84	SE	Skagerrak
	1642006	M01642006	https://preprints.arphahub.com/article/60597/	Marine images and movies from Remotely Operated Vehicle (ROV)	MachineObservation	Roger Johansson, University of Gothenburg	University of Gothenburg	MovingImage	movie available on request		CC BY 4.0	2014-09-04	Marine images and movies from Remotely Operated Vehicle (ROV)	"Total_time":"10"| Total_length_m":"unknown"	"Säcken reef"	Reef Säcken	Kosterhavet	9.2 Marine Neritic – Subtidal rock and rocky reefs	Animalia	Metazoa	kingdom	present	58.8794	11.1131	WGS84	SE	Skagerrak
